# Supplementary material
Source: PubMed Central journal article supplement (PMC4111275)
Supplement: NIHMS612537-supplement-01.pdf [file NIHMS612537-supplement-01.pdf]

# Web Supplementary Materials for “A Modified Adaptive Lasso for Identifying Interactions in the Cox Model with the Heredity Constraint”

Lu Wang<sup>a,\*</sup>, Jincheng Shen<sup>a</sup>, Peter F. Thall<sup>b</sup>

<sup>a</sup>*Department of Biostatistics, University of Michigan, 1415 Washington Heights, Ann Arbor, MI 48109, USA*

<sup>b</sup>*Department of Biostatistics, M.D. Anderson Cancer Center, Houston, Texas 77030, USA*

---

---

## Appendix 1: Regularity conditions.

Following the notation in Andersen & Gill (1982), we consider a finite time interval  $[0, \tau]$  with  $\tau < \infty$ . To facilitate the notation, let  $N_i(t) = I\{T_i \leq t, T_i \leq C_i\}$  and  $Y_i(t) = I\{T_i \geq t, C_i \geq t\}$ . Define  $H_i(\theta, t) = Y_i(t) \exp\{g(X_i, \theta)\}$ ,  $S^{(0)}(\theta, t) = n^{-1} \sum_{i=1}^n H_i(\theta, t)$ ,  $S^{(1)}(\theta, t) = n^{-1} \sum_{i=1}^n \nabla_{\theta} H_i(\theta, t)$ ,  $S^{(2)}(\theta, t) = n^{-1} \sum_{i=1}^n \nabla_{\theta}^2 H_i(\theta, t)$ , and  $S^{(3)}(\theta, t) = n^{-1} \sum_{i=1}^n \nabla_{\theta}^3 H_i(\theta, t)$ , where  $\nabla_{\theta}(\cdot)$  denotes the first derivative with respect of  $\theta$ ,  $\nabla_{\theta}^2(\cdot)$  and  $\nabla_{\theta}^3(\cdot)$  denote the second and third order derivatives respectively.

We assume the following regularity conditions hold for Theorem 1:

(1)  $\int_0^{\tau} \lambda_0(t) dt < \infty$

(2) There exists a neighbourhood  $\Theta$  of  $\theta_0$  and  $s^{(0)}(\theta, t)$ ,  $s^{(1)}(\theta, t)$ ,  $s^{(2)}(\theta, t)$  and  $s^{(3)}(\theta, t)$  defined on  $\Theta \times [0, \tau]$  such that for  $j = 0, 1, 2$  and 3.

$$\sup_{t \in [0, \tau], \theta \in \Theta} \|S^{(j)}(\theta, t) - s^{(j)}(\theta, t)\| \rightarrow_{\mathcal{P}} 0$$

where  $\|\cdot\|$  is the  $L_1$ -norm.

(3) Let  $\Theta$ ,  $s^{(0)}(\cdot, \cdot)$ ,  $s^{(1)}(\cdot, \cdot)$ ,  $s^{(2)}(\cdot, \cdot)$  and  $s^{(3)}(\cdot, \cdot)$  be as in Condition (2) and define  $e = s^{(1)}/s^{(0)}$  and  $v = s^{(2)}/s^{(0)} - e \otimes e$ . For all  $\theta \in \Theta$ ,  $t \in [0, \tau]$ ,  $s^{(0)}(\cdot, t)$ ,  $s^{(1)}(\cdot, t)$  and  $s^{(2)}(\cdot, t)$  are continuous functions of  $\theta \in \Theta$ , uniformly in  $t \in [0, \tau]$ ,  $s^{(0)}(\theta, t)$ ,  $s^{(1)}(\theta, t)$ ,  $s^{(2)}(\theta, t)$ , and  $s^{(3)}(\theta, t)$  are bounded on  $\Theta \times [0, \tau]$ ; and  $s^{(0)}(\theta, t)$  is bounded away from zero on  $\Theta \times [0, \tau]$ . Let

---

\*Corresponding author.

*Email address:* [luwang@umich.edu](mailto:luwang@umich.edu) (Lu Wang)

$$u^{(2)}(\theta) = \nabla_{\theta}^2 g(X, \theta),$$

$$I(\theta_0) = \int_0^{\tau} \{\nu(\theta_0, t) - u^{(2)}(\theta_0)\} s^{(0)}(\theta_0, t) \lambda_0(t) dt,$$

and we require the submatrix  $\mathcal{I}_a(\beta_{a0}, \gamma_{a0})$  from  $I(\theta_0)$  that corresponds to the non-zero  $(\beta_{a0}, \gamma_{a0})$  is positive definite.

For Theorem 2, we denote  $H_i(\theta_n, t) = Y_i(t) \exp\{g(\theta_n, X_{n,i})\}$ . Define  $\phi_{i,j}(\theta_n, t) = \{\partial H_i(\theta_n, t)/\partial \theta_{n,j}\} / \{n^{-1} \sum_{i=1}^n H_i(\theta_n, t)\}$ ,  $W_j^{(1)}(\theta_n, t) = n^{-1} \sum_{i=1}^n \phi_{i,j}(\theta_n, t)$ ,  $W_{jk}^{(2)}(\theta_n, t) = n^{-1} \sum_{i=1}^n \partial \phi_{i,j}(\theta_n, t)/\partial \theta_{n,k}$ , and  $W_{jkl}^{(3)}(\theta_n, t) = n^{-1} \sum_{i=1}^n \partial \phi_{i,j}(\theta_n, t)/(\partial \theta_{n,k} \partial \theta_{n,l})$ , for any  $j, k, l = 1, \dots, p_n(p_n+1)/2$ . We further denote  $W_{jk}^{(1,2)}(\theta_n, t) = n^{-1} \sum_{i=1}^n \{\phi_{i,j}(\theta_n, t) \phi_{i,k}(\theta_n, t)\}^2$ ,  $W_{jk}^{(2,2)}(\theta_n, t) = n^{-1} \sum_{i=1}^n \{\partial \phi_{i,j}(\theta_n, t)/\partial \theta_{n,k}\}^2$ , and  $W_{jkl}^{(3,2)}(\theta_n, t) = n^{-1} \sum_{i=1}^n \{\partial^2 \phi_{i,j}(\theta_n, t)/\partial \theta_{n,k} \partial \theta_{n,l}\}^2$ . We assume the following regularity conditions in Theorem 2.

$$(4) \int_0^{\tau} \lambda_0(t) dt < \infty$$

(5) There exists a neighbourhood  $\Theta_n$  of  $\theta_{n,0}$  and  $w_j^{(1)}(\theta_n, t)$ ,  $w_{jk}^{(2)}(\theta_n, t)$ ,  $w_{jkl}^{(3)}(\theta_n, t)$ ,  $w_{jk}^{(1,2)}(\theta_n, t)$ ,  $w_{jk}^{(2,2)}(\theta_n, t)$ ,  $w_{jkl}^{(3,2)}(\theta_n, t)$ , defined on  $\Theta_n \times [0, \tau]$  such that for  $m = 1, 2, 3$ ,

$$\sup_{t \in [0, \tau], \theta_n \in \Theta_n} \|W^{(m)}(\theta_n, t) - w^{(m)}(\theta_n, t)\| \rightarrow_{\mathcal{P}} 0,$$

and moreover,

$$\sup_{t \in [0, \tau], \theta_n \in \Theta_n} \|W^{(1,2)}(\theta_n, t) - w^{(1,2)}(\theta_n, t)\| \rightarrow_{\mathcal{P}} 0$$

$$\sup_{t \in [0, \tau], \theta_n \in \Theta_n} \|W^{(2,2)}(\theta_n, t) - w^{(2,2)}(\theta_n, t)\| \rightarrow_{\mathcal{P}} 0$$

$$\sup_{t \in [0, \tau], \theta_n \in \Theta_n} \|W^{(3,2)}(\theta_n, t) - w^{(3,2)}(\theta_n, t)\| \rightarrow_{\mathcal{P}} 0.$$

(6) For all  $\theta_n \in \Theta_n$ ,  $t \in [0, \tau]$ ,  $w^{(1)}(\cdot, t)$ ,  $w^{(2)}(\cdot, t)$ ,  $w^{(3)}(\cdot, t)$ ,  $w^{(1,2)}(\cdot, t)$ ,  $w^{(2,2)}(\cdot, t)$ ,  $w^{(3,2)}(\cdot, t)$  are continuous functions of  $\theta_n \in \Theta_n$ , uniformly in  $t \in [0, \tau]$ , and  $w^{(1)}(\theta_n, t)$ ,  $w^{(2)}(\theta_n, t)$ ,  $w^{(3)}(\theta_n, t)$  and  $w^{(1,2)}(\theta_n, t)$ ,  $w^{(2,2)}(\theta_n, t)$ ,  $w^{(3,2)}(\theta_n, t)$  are bounded on  $\Theta_n \times [0, \tau]$ . Let  $u^{(2)}(\theta_n)$  denote  $\nabla_{\theta_n}^2 g(X, \theta_n)$  and  $w^{(2)}(\theta_n, t)$  denote the matrix with  $\{w^{(2)}(\theta_n, t)\}_{jk} = w_{jk}^{(2)}(\theta_n, t)$  for all

$j, k = 1, \dots, p_n(p_n + 1)/2$ . Then define

$$I(\theta_{n,0}) = \int_0^\tau \{w^{(2)}(\theta_{n,0}, t) - u^{(2)}(\theta_{n,0})\} s^{(0)}(\theta_{n,0}, t) \lambda_0(t) dt,$$

and let  $\mathcal{I}_{an}(\beta_{a0}, \gamma_{a0})$  denote the submatrix of  $I(\theta_{n,0})$  with respect to the non-zero  $(\beta_{a0}, \gamma_{a0})$ . It satisfies  $0 < C_1 < \lambda_{\min}\{\mathcal{I}_{an}(\beta_{a0}, \gamma_{a0})\} \leq \lambda_{\max}\{\mathcal{I}_{an}(\beta_{a0}, \gamma_{a0})\} < C_2 < \infty$  for all  $n$ , where  $\lambda_{\min}(\cdot)$  and  $\lambda_{\max}(\cdot)$  represent the smallest and largest eigenvalues of a matrix respectively.

## Appendix 2: Proof of Theorem 1.

The log partial likelihood  $l_n(\theta)$  can be written as

$$l_n(\theta) = \sum_{i=1}^n \int_0^\tau g(X_i, \theta) dN_i(s) - \int_0^\tau \log \left[ \sum_{i=1}^n Y_i(s) \exp\{g(X_i, \theta)\} \right] d\tilde{N}(s)$$

where  $\tilde{N}(\cdot) = \sum_{i=1}^n N_i(\cdot)$ . By Theorem 4.1 and Lemma 3.1 of ?, it follows that, for each  $\theta$  in a neighbourhood of  $\theta_0$ :

$$\frac{1}{n} \{l_n(\theta) - l_n(\theta_0)\} = \int_0^\tau \left[ (\theta - \theta_0)^T s^{(1)}(\theta_0, t) - \log \left\{ \frac{s^{(0)}(\theta, t)}{s^{(0)}(\theta_0, t)} \right\} s^{(0)}(\theta_0, t) \right] \lambda_0(t) dt + O_p \left( \frac{\|\theta - \theta_0\|}{\sqrt{n}} \right).$$

Let  $\eta_n = n^{-1/2} + \xi_n$ , consider the  $C$ -ball  $B_n(C) = \{\theta : \theta = \theta_0 + \eta_n \delta, \|\delta\| \leq C\}$ ,  $C > 0$ . For any  $\theta \in B_n(C)$ , by the second-order Taylor expansion of the log partial likelihood, and by the weak law of large numbers, we have

$$\frac{1}{n} \{l_n(\theta_0 + \eta_n \delta) - l_n(\theta_0)\} = \frac{1}{n} \nabla_\theta^T l_n(\theta_0) \eta_n \delta - \frac{1}{2} \eta_n^2 \delta^T \{I(\theta_0) + o_p(1)\} \delta$$

where  $\|\delta\| \leq C$ . We further write  $\delta = (u_1, \dots, u_p, v_{12}, \dots, v_{p-1,p})^T = (u^T, v^T)^T$ . Then let

$$\begin{aligned} D_n(\delta) &\equiv \frac{1}{n} \{Q_n(\theta_0 + \eta_n \delta) - Q_n(\theta_0)\} \\ &= -\frac{1}{n} \{l_n(\theta_0 + \eta_n \delta) - l_n(\theta_0)\} + \sum_{j=1}^p \lambda_{j,n}^\beta (|\beta_{0j} + \eta_n u_j| - |\beta_{0j}|) + \sum_{j < j'} \lambda_{j,j',n}^\gamma (|\gamma_{0j,j'} + \eta_n v_{j,j'}| - |\gamma_{0j,j'}|) \\ &\geq -\frac{1}{n} \{l_n(\theta_0 + \eta_n \delta) - l_n(\theta_0)\} - \eta_n^2 \left( \sum_{\{j:\beta_{0j} \in \beta_{a0}\}} |u_j| + \sum_{\{(j,j'):\gamma_{0j,j'} \in \gamma_{a0}\}} |v_{j,j'}| \right) \end{aligned}$$

$$\geq -\frac{1}{n} \{l_n(\theta_0 + \eta_n \delta) - l_n(\theta_0)\} - \eta_n^2 (|\beta_{a0}| + |\gamma_{a0}|) C \equiv A_1 + A_2 + A_3$$

where  $|\cdot|$  measures the number of elements of the vector inside,

$$A_1 = -\frac{1}{n} \nabla_{\theta} l_n(\theta_0) (\eta_n \delta) = O_p(n^{-1/2}) (\eta_n \delta)$$

$$A_2 = \frac{1}{2} (\eta_n \delta)^T \{I(\theta_0) + o_p(1)\} (\eta_n \delta) = \frac{1}{2} (\eta_n \delta_a)^T \{\mathcal{I}_a(\beta_{a0}, \gamma_{a0}) + o_p(1)\} (\eta_n \delta_a)$$

$$A_3 = -\eta_n^2 (|\beta_{a0}| + |\gamma_{a0}|) C,$$

and  $\delta_a$  is the sub-vector of  $\delta$  correspond to non-zero  $(\beta_{a0}, \gamma_{a0})$ . Notice that  $A_2$  dominates  $A_1$  and  $A_3$  and is positive since  $\mathcal{I}_a(\beta_{a0}, \gamma_{a0})$  is positive definite. Therefore, for any given  $\epsilon > 0$ , there exists a large enough constant  $d$  such that

$$P \left\{ \inf_{\theta \in B_n(d)} Q_n(\theta) > Q_n(\theta_0) \right\} \geq 1 - \epsilon.$$

This implies that with probability at least  $1 - \epsilon$ , there exists a local minimizer in the ball  $B_n(C)$  such that  $\|\hat{\theta}_n - \theta_0\| = O_p(\eta_n) = O_p(n^{-1/2})$ .

Now for the sparsity, we first show  $P(\hat{\beta}_{bn} = 0) \rightarrow 1$ . It is sufficient to show for any  $\{j : \beta_{0j} \in \beta_{b0}\}$ ,

$$\frac{\partial Q_n(\hat{\theta}_n)}{\partial \beta_j} > 0 \text{ for } 0 < \hat{\beta}_j < \epsilon_n \tag{1}$$

and

$$\frac{\partial Q_n(\hat{\theta}_n)}{\partial \beta_j} < 0 \text{ for } -\epsilon_n < \hat{\beta}_j < 0 \tag{2}$$

with probability tending to 1, where  $\epsilon_n = Cn^{-1/2}$  and  $C > 0$  is any constant. To show (1), notice

$$\begin{aligned} \frac{\partial Q_n(\hat{\theta}_n)}{\partial \beta_j} &= -\frac{\partial l_n(\hat{\theta}_n)}{\partial \beta_j} + \lambda_{j,n}^{\beta} \text{sign}(\beta_j) = -\frac{\partial l_n(\theta_0)}{\partial \beta_j} - \sum_{k=1}^{p(p+1)/2} \frac{\partial^2 l_n(\theta_0)}{\partial \beta_j \partial \theta_k} (\hat{\theta}_k - \theta_{0k}) \\ &\quad - \sum_{k=1}^{\frac{p(p+1)}{2}} \sum_{l=1}^{\frac{p(p+1)}{2}} \frac{\partial^3 l_n(\tilde{\theta})}{\partial \beta_j \partial \theta_k \partial \theta_l} (\hat{\theta}_k - \theta_{0k}) (\hat{\theta}_l - \theta_{0l}) + \lambda_{j,n}^{\beta} \text{sign}(\beta_j), \end{aligned}$$

where  $\tilde{\theta}$  lies between  $\hat{\theta}_n$  and  $\theta_0$ . By the regularity conditions and  $\|\hat{\theta}_n - \theta_0\| = O_p(n^{-1/2})$ ,

$$\frac{\partial Q_n(\hat{\theta}_n)}{\partial \beta_j} = \sqrt{n} \left\{ O_p(1) + \sqrt{n} \lambda_{j,n}^\beta \text{sign}(\hat{\beta}_j) \right\}.$$

As  $\sqrt{n} \lambda_j^\beta \rightarrow \infty$  for  $j \in \{j : \beta_{0j} \in \beta_{b0}\}$ , the sign of  $\partial Q_n(\hat{\theta}_n)/\partial \beta_j$  is dominated by  $\text{sign}(\hat{\beta}_j)$ .

Therefore,

$$P \left[ \frac{\partial Q_n(\hat{\theta}_n)}{\partial \beta_j} > 0 \text{ for } 0 < \hat{\beta}_j < \epsilon_n \right] \rightarrow 1 \text{ as } n \rightarrow \infty$$

Similarly, we can show (2), and  $P(\hat{\beta}_{bn} = 0) \rightarrow 1$  follows. We can similarly prove that  $P(\hat{\gamma}_{bn} = 0) \rightarrow 1$ .

For  $(j, j') \in \{(j, j') : \gamma_{0j,j'} \in \gamma_{c0}\}$ , without loss of generality, assume that  $\beta_{0j} = 0$ . Notice that  $\hat{\beta}_j = 0$  implies  $\hat{\gamma}_{j,j'} = 0$ . Since we already have  $P(\hat{\beta}_j = 0) \rightarrow 1$ , we can conclude  $P(\hat{\gamma}_{j,j'} = 0) \rightarrow 1$  as well, i.e.  $P(\hat{\gamma}_{cn} = 0) \rightarrow 1$  as  $n \rightarrow \infty$ . Thus, we finish the proof for Part (i) of Theorem 1.

Next we show the asymptotic normality. Let  $\tilde{Q}_n(\theta_a)$  denote the objective function  $Q_n$  only on the nonzero component of  $\theta$ , i.e.  $\theta_a = (\beta_a^T, \gamma_a^T)^T$ . We define  $\theta_b = (\beta_b^T, \gamma_b^T, \gamma_c^T)^T$ , and from the above derivation, we have  $P(\hat{\theta}_b = 0) \rightarrow 1$ . Thus,

$$P \left[ \arg \min_{\theta_a} \tilde{Q}_n(\theta_a) = \left( \theta_a - \text{component of } \arg \min_{\theta} Q_n(\theta) \right) \right] \rightarrow 1.$$

It means that  $\hat{\theta}_a$  should satisfy

$$\frac{\partial \tilde{Q}_n(\theta_a)}{\partial \theta_j} \Big|_{\theta_a = \hat{\theta}_a} = 0, \quad \forall j \in \{j : \theta_j \in \theta_a\}$$

with probability tending to 1.

Let  $\tilde{l}_n(\theta_a)$  and  $\tilde{P}_\lambda(\theta_a)$  denote the log-likelihood function of  $\theta_a$  and the penalty function of  $\theta_a$  respectively so that we have

$$\tilde{Q}_n(\theta_a) = -\tilde{l}_n(\theta_a) + \tilde{P}_\lambda(\theta_a)$$

Then

$$\nabla_{\theta_a} \tilde{Q}_n(\hat{\theta}_a) = -\nabla_{\theta_a} \tilde{l}_n(\hat{\theta}_a) + \nabla_{\theta_a} \tilde{P}_\lambda(\hat{\theta}_a) = 0 \tag{3}$$

with probability tending to 1.

By Taylor expansion, it is easy to show that

$$B_1 = \nabla_{\theta_a} \tilde{l}_n(\hat{\theta}_a) = \sqrt{n} \left[ \frac{1}{\sqrt{n}} \nabla_{\theta_a} \tilde{l}_n(\theta_{a0}) - \mathcal{I}_a(\beta_{a0}, \gamma_{a0}) \sqrt{n}(\hat{\theta}_a - \theta_{a0}) + o_p(1) \right]$$

and

$$B_2 = \nabla_{\theta_a} \tilde{P}_\lambda(\hat{\theta}_a) = \left\{ \left[ \begin{array}{c} \lambda_{j,n}^\beta \text{sign}(\beta_j) \\ \lambda_{j,j',n}^\gamma \text{sign}(\gamma_{j,j'}) \end{array} \right]_{\beta_j \in \beta_a, \gamma_{j,j'} \in \gamma_a} + o_p(1)(\hat{\theta}_a - \theta_{a0}) \right\}.$$

Since we have  $\|\hat{\theta}_a - \theta_{a0}\| = O_p(n^{-1/2})$ , together with (3), we have

$$\sqrt{n}(\hat{\theta}_a - \theta_{a0}) = \mathcal{I}_a(\beta_{a0}, \gamma_{a0})^{-1} \frac{1}{\sqrt{n}} \nabla_{\theta_a} \tilde{l}_n(\theta_{a0}) + o_p(1).$$

Part (ii) of Theorem 1 then follows by applying the central limit theorem.

### Appendix 3: Proof of Theorem 2.

Similarly, under the regularity conditions in Appendix 1, we argue that there exists a local minimizer  $\hat{\theta}_n$  of  $Q_n(\theta)$  such that  $\|\hat{\theta}_n - \theta_{n,0}\| = O_p(\sqrt{q_n}(n^{1/2} + \xi_n))$ . Let  $\eta_n = \sqrt{q_n}(n^{-1/2} + \xi_n)$ , consider the C-ball  $\{\theta_n = \theta_{n,0} + \eta_n \delta, \|\delta\| \leq C\}$ ,  $C > 0$ . We define  $D_n(\delta) \equiv \{Q_n(\theta_{n,0} + \eta_n \delta) - Q_n(\theta_{n,0})\} / n$ , then for any  $\delta = (u_1, \dots, u_p, v_{12}, \dots, v_{p-1,p})^T = (u^T, v^T)^T$  that satisfies  $\|\delta\| \leq C$ , similarly as in Appendix 2, we have

$$\begin{aligned} D_n(\delta) &\equiv \frac{1}{n} \{Q_n(\theta_{n,0} + \eta_n \delta) - Q_n(\theta_{n,0})\} \geq -\frac{1}{n} \{l_n(\theta_{n,0} + \eta_n \delta) - l_n(\theta_{n,0})\} - \eta_n (\sqrt{q_n} \xi_n) C \\ &= -\frac{1}{n} \nabla_{\theta_n}^T l_n(\theta_{n,0}) (\eta_n \delta) + \frac{1}{2} (\eta_n \delta)^T \{I(\theta_{n,0}) + o_p(1)\} (\eta_n \delta) - \eta_n^2 C \equiv \tilde{A}_1 + \tilde{A}_2 + \tilde{A}_3 \end{aligned}$$

where

$$\tilde{A}_1 = -\frac{1}{n} \nabla_{\theta_n}^T l_n(\theta_{n,0}) (\eta_n \delta) \quad \text{and} \quad |\tilde{A}_1| \leq n^{-1/2} \eta_n O_p(\sqrt{q_n}) C = O_p(\eta_n^2) C,$$

$$\tilde{A}_2 = \frac{1}{2} (\eta_n \delta)^T \{I(\theta_{n,0}) + o_p(1)\} (\eta_n \delta) = \frac{1}{2} (\eta_n \delta_a)^T \{\mathcal{I}_{an}(\beta_{a0}, \gamma_{a0}) + o_p(1)\} (\eta_n \delta_a), \quad \tilde{A}_3 = \eta_n^2 C,$$

and  $\delta_a$  is the sub-vector of  $\delta$  correspond to non-zero  $(\beta_{a0}, \gamma_{a0})$ . Similarly,  $\tilde{A}_2$  dominates  $\tilde{A}_1$  and  $\tilde{A}_3$ , and is positive since  $\mathcal{I}_{an}(\beta_{a0}, \gamma_{a0})$  is positive definite. Therefore, for any given  $\epsilon > 0$ , there

exists a large enough constant  $C$  such that

$$P \left\{ \inf_{\|\delta\| \leq C} Q_n(\theta_{n,0} + \eta_n \delta) > Q_n(\theta_{n,0}) \right\} \geq 1 - \epsilon.$$

This implies that with probability at least  $1 - \epsilon$ , there exists a local minimizer in the ball  $B_n(C)$  such that  $\|\hat{\theta}_n - \theta_{n,0}\| = O_p(\eta_n)$ .

We now show  $P(\hat{\beta}_{bn} = 0) \rightarrow 1$ . It is sufficient to show that for any  $j \in \{j : \beta_{n,j} \in \beta_{bn}\}$ ,

$$\frac{\partial Q_n(\hat{\theta}_n)}{\partial \beta_{n,j}} > 0 \text{ for } 0 < \hat{\beta}_{n,j} < \epsilon_n \quad (4)$$

$$\frac{\partial Q_n(\hat{\theta}_n)}{\partial \beta_{n,j}} < 0 \text{ for } -\epsilon_n < \hat{\beta}_{n,j} < 0 \quad (5)$$

with probability tending to 1, where  $\epsilon_n = Cn^{-1/2}$  and  $C > 0$  is any constant. Notice

$$\begin{aligned} \frac{\partial Q_n(\hat{\theta}_n)}{\partial \beta_{n,j}} &= -\frac{\partial l_n(\hat{\theta}_n)}{\partial \beta_{n,j}} + \lambda_{j,n}^{\beta_n} \text{sign}(\beta_{n,j}) \\ &= -\frac{\partial l_n(\theta_{n,0})}{\partial \beta_{n,j}} - \sum_{k=1}^{q_n} \frac{\partial^2 l_n(\theta_{n,0})}{\partial \beta_{n,j} \partial \theta_{n,k}} (\hat{\theta}_{n,k} - \theta_{n,0k}) \\ &\quad - \sum_{k=1}^{q_n} \sum_{l=1}^{q_n} \frac{\partial^3 l_n(\tilde{\theta})}{\partial \beta_{n,j} \partial \theta_{n,k} \partial \theta_{n,l}} (\hat{\theta}_{n,k} - \theta_{n,0k}) (\hat{\theta}_{n,l} - \theta_{n,0l}) + \lambda_{j,n}^{\beta_n} \text{sign}(\beta_{n,j}), \end{aligned}$$

where  $\tilde{\theta}_n$  lies between  $\hat{\theta}_n$  and  $\theta_{n,0}$ . By the regularity conditions, and notice  $\|\hat{\theta}_n - \theta_{n,0}\| = O_p(\sqrt{q_n/n})$ ,

$$\frac{\partial Q_n(\hat{\theta}_n)}{\partial \beta_{n,j}} = \sqrt{nq_n} \left\{ O_p(1) + \sqrt{\frac{n}{q_n}} \lambda_{j,n}^{\beta_n} \text{sgn}(\hat{\beta}_{n,j}) \right\}.$$

As  $\sqrt{n/q_n} \lambda_{j,n}^{\beta_n} \rightarrow \infty$  for  $j \in \{j : \beta_{n,j} \in \beta_{bn}\}$ , the sign of  $\partial Q_n(\hat{\theta}_n)/\partial \beta_{n,j}$  is the same as  $\text{sign}(\hat{\beta}_{n,j})$ .

Therefore,

$$P \left[ \frac{\partial Q_n(\hat{\theta}_n)}{\partial \beta_{n,j}} > 0 \text{ for } 0 < \hat{\beta}_{n,j} < \epsilon_n \right] \rightarrow 1 \text{ as } n \rightarrow \infty$$

and (4) holds with probability tending to 1. Parallel to this, one can show (5) holds with probability tending to 1.

Similar argument can be used to prove  $P(\hat{\gamma}_{n,j,j'} = 0) \rightarrow 1$  as  $n \rightarrow \infty$ , for  $\hat{\gamma}_{n,j,j'} \in \hat{\gamma}_{bn}$ , thus  $P(\hat{\gamma}_{bn} = 0) \rightarrow 1$ .

For  $\hat{\gamma}_{n,j,j'} \in \hat{\gamma}_{cn}$ , without loss of generality, assume that  $\beta_{n,0j} = 0$ . Notice that  $\hat{\beta}_{n,j} = 0$  implies  $\hat{\gamma}_{n,j,j'} = 0$ , because if  $\hat{\gamma}_{n,j,j'} \neq 0$ , then the value of the loss function does not change but the value of the penalty function increases. Therefore,  $P(\hat{\gamma}_{n,j,j'} = 0) \rightarrow 1$  follows since we have already shown  $P(\hat{\beta}_{n,j} = 0) \rightarrow 1$ .

Thus, Part (i) of Theorem 2 is proved.

Now, we prove the asymptotic normality. Denote  $\theta_{an} = (\beta_{an}^T, \gamma_{an}^T)^T$ , then

$$\begin{aligned} \sqrt{n}\Omega_n I_{an}^{1/2}(\theta_{an,0}) \left( \hat{\theta}_{an} - \theta_{an,0} \right) &= \sqrt{n}\Omega_n I_{an}^{-1/2}(\theta_{an,0}) I_{an}(\theta_{an,0}) \left( \hat{\theta}_{an} - \theta_{an,0} \right) \\ &= \sqrt{n}\Omega_n \mathcal{I}_{an}^{-1/2}(\beta_{a0}, \gamma_{a0}) \left\{ \frac{1}{n} \nabla l_n(\theta_{an,0}) + o_p(n^{-1/2}) \right\} \\ &= \frac{1}{\sqrt{n}} \Omega_n \mathcal{I}_{an}^{-1/2}(\beta_{a0}, \gamma_{a0}) \sum_{i=1}^n [\nabla l_n(\theta_{an,0})] + o_p(1) \equiv \sum_{i=1}^n Y_{ni} + o_p(1), \end{aligned}$$

where  $Y_{ni} = n^{-1/2} \Omega_n \mathcal{I}_{an}^{-1/2}(\beta_{a0}, \gamma_{a0}) \sum_{i=1}^n [\nabla l_n(\theta_{an,0})]$ .

We now show that with probability tending to 1,  $\sum_{i=1}^n Y_{ni} + o_p(1) \rightarrow_d N(0, \Sigma)$ :

(i) We first show  $\mathcal{I}_{an}(\beta_{a0}, \gamma_{a0}) \left( \hat{\theta}_{an} - \theta_{an,0} \right) = n^{-1} \nabla l_n(\theta_{an,0}) + o_p(n^{-1/2})$ . With probability tending to 1,

$$0 = \nabla_{\theta_{an}} Q_n(\hat{\theta}_{an}) = -\frac{1}{n} \nabla_{\theta_{an}} l_n(\hat{\theta}_{an}) + \nabla_{\theta_{an}} \left\{ \sum_{\{j:\beta_{n,0j} \in \beta_{a0}\}} \lambda_{j,n}^{\beta_n} \hat{\beta}_{n,0j} + \sum_{\{(j,j'):\gamma_{n,0j,j'} \in \gamma_{a0}\}} \lambda_{j,j',n}^{\gamma_n} \hat{\gamma}_{n,0j,j'} \right\}.$$

Taking Taylor Expansion at  $\theta_{an} = \theta_{a0}$ , we have

$$\begin{aligned} 0 &= -\nabla_{\theta_{an}} l_n(\theta_{a0}) - [\nabla_{\theta_{an}}^2 l_n(\theta_{a0})] \left( \hat{\theta}_{an} - \theta_{a0} \right) - \frac{1}{2} \left( \hat{\theta}_{an} - \theta_{a0} \right)^T [\nabla_{\theta_{an}}^2 (\nabla_{\theta_{an}} l_n(\theta_{a0}))] \left( \hat{\theta}_{an} - \theta_{a0} \right) \\ &\quad + n \nabla_{\theta_{an}} \left\{ \sum_{\{j:\beta_{n,0j} \in \beta_{a0}\}} \lambda_{j,n}^{\beta_n} \beta_{n,0j} + \sum_{\{(j,j'):\gamma_{n,0j,j'} \in \gamma_{a0}\}} \lambda_{j,j',n}^{\gamma_n} \gamma_{n,0j,j'} \right\}. \end{aligned}$$

Thus,

$$\begin{aligned} \mathcal{I}_{an}^{-1/2}(\beta_{a0}, \gamma_{a0}) \left( \hat{\theta}_{an} - \theta_{a0} \right) &= -\frac{1}{n} \nabla_{\theta_{an}}^2 l_n(\theta_{a0}) \left( \hat{\theta}_{an} - \theta_{a0} \right) + \left\{ \mathcal{I}_{an}^{-1/2}(\beta_{a0}, \gamma_{a0}) + \frac{1}{n} \nabla_{\theta_{an}}^2 l_n(\theta_{a0}) \right\} \left( \hat{\theta}_{an} - \theta_{a0} \right) \\ &= \frac{1}{n} \nabla_{\theta_{an}} l_n(\theta_{a0}) + \frac{1}{2n} \left( \hat{\theta}_{an} - \theta_{a0} \right)^T [\nabla_{\theta_{an}}^2 (\nabla_{\theta_{an}} l_n(\theta_{a0}))] \left( \hat{\theta}_{an} - \theta_{a0} \right) \end{aligned}$$



$$\begin{aligned}
& -\nabla_{\theta_{an}} \left\{ \sum_{\{j:\beta_{n,0j} \in \beta_{a0}\}} \lambda_{j,n}^{\beta_n} \beta_{n,0j} + \sum_{\{(j,j'):\gamma_{n,0j,j'} \in \gamma_{a0}\}} \lambda_{j,j',n}^{\gamma_n} \gamma_{n,0j,j'} \right\} \\
& + \left\{ \mathcal{I}_{an}^{-1/2}(\beta_{a0}, \gamma_{a0}) + \frac{1}{n} \nabla_{\theta_{an}}^2 l_n(\theta_{a0}) \right\} (\hat{\theta}_{an} - \theta_{a0}).
\end{aligned}$$

Therefore, it is sufficient to show that

$$\begin{aligned}
& \frac{1}{2n} (\hat{\theta}_{an} - \theta_{a0})^T [\nabla_{\theta_{an}}^2 (\nabla_{\theta_{an}} l_n(\theta_{a0}))] (\hat{\theta}_{an} - \theta_{a0}) \\
& - \nabla_{\theta_{an}} \left\{ \sum_{\{j:\beta_{n,0j} \in \beta_{a0}\}} \lambda_{j,n}^{\beta_n} \beta_{n,0j} + \sum_{\{(j,j'):\gamma_{n,0j,j'} \in \gamma_{a0}\}} \lambda_{j,j',n}^{\gamma_n} \gamma_{n,0j,j'} \right\} \\
& + \left\{ \mathcal{I}_{an}(\beta_{a0}, \gamma_{a0}) + \frac{1}{n} \nabla_{\theta_{an}}^2 l_n(\theta_{a0}) \right\} (\hat{\theta}_{an} - \theta_{a0}) = o_p(n^{-1/2}).
\end{aligned}$$

Denote the three terms in the above equation as  $D_1$ ,  $D_2$ , and  $D_3$ . First, by Cauchy-Schwarz inequality,

$$\begin{aligned}
\|D_1\|^2 & \leq \frac{1}{4n^2} \|\nabla_{\theta_{an}}^2 (\nabla_{\theta_{an}} l_n(\theta_{an,0}))\|^2 \|\hat{\theta}_{an} - \theta_{a0}\|^4 \\
& = \frac{1}{4n^2} \sum_{\{(j,k,l):\theta_{n,j}, \theta_{n,k}, \theta_{n,l} \in \theta_{an}\}} n^2 O_p(1) O_p\left(\frac{q_n^2}{n}\right) = O_p(q_n^5/n^2) = o_p(1/n)
\end{aligned}$$

Secondly, because  $\xi_n = o(1/\sqrt{nq_n})$ ,

$$\begin{aligned}
\|D_2\|^2 & = \left\| \left( \lambda_{1,n}^{\beta_n} \text{sign}(\beta_{n,01}), \dots, \lambda_{p_{n-1}, p_n, n}^{\gamma_n} \text{sign}(\gamma_{n,0(p_{n-1}, p_n)}) \right)^T \right\|^2 \\
& \leq |\theta_{an}| \xi_n^2 = |\theta_{an}| o(1/nq_n) = o_p(1/n)
\end{aligned}$$

Third, it can be shown that

$$\begin{aligned}
\|D_3\|^2 & \leq \left\| \mathcal{I}_{an}(\beta_{a0}, \gamma_{a0}) + \frac{1}{n} \nabla_{\theta_{an}}^2 l_n(\theta_{a0}) \right\|^2 \|\hat{\theta}_{an} - \theta_{a0}\|^2 \\
& = o_p(1/q_n^2) O_p(q_n/n) = o_p(1/nq_n) = o_p(1/n)
\end{aligned}$$

Therefore,  $D_1 + D_2 + D_3 = o_p(n^{-1/2})$ .

Next, we show  $\sum_{i=1}^n Y_{ni} + o_p(1) \rightarrow_d N(0, \Sigma)$ . It is sufficient to show that  $Y_{ni}$ ,  $i = 1, \dots, n$  satisfies the conditions for Lindeberg-Feller central limit theorem. For any given  $\epsilon > 0$ , by

Cauchy-Schwarz inequality,

$$\sum_{i=1}^n E [\|Y_{ni}\|^2 I \{\|Y_{ni}\| > \epsilon\}] = nE [\|Y_{n1}\|^2 I \{\|Y_{n1}\| > \epsilon\}] \leq nD_4^{1/2}D_5^{1/2}$$

where  $D_4 = [E \|Y_{ni}\|^4]$  and  $D_5 = E \{I (\|Y_{ni}\| > \epsilon)\}$ . Note

$$\begin{aligned} D_4 &= \frac{1}{n^2} E \left\| \Omega_n \mathcal{I}_{an}^{-1/2}(\beta_{a0}, \gamma_{a0}) \nabla_{\theta_{an}} l_n(\theta_{a0}) \right\|^4 \\ &\leq \frac{1}{n^2} \left\| \Omega_n^T \Omega_n \right\|^2 \|I_{an}(\theta_{a0})\|^{-2} E \left\| \nabla_{\theta_{an}}^T l_n(\theta_{a0}) \nabla_{\theta_{an}} l_n(\theta_{a0}) \right\|^2 \\ &= \frac{1}{n^2} \lambda_{\max}^2(\Omega_n^T \Omega_n) \lambda_{\max}^2 \{I_{an}^{-1}(\theta_{a0})\} O(|\theta_{an}|^2) = O(q_n^2/n^2). \end{aligned}$$

By Markov inequality,

$$D_5 = E \{I (\|Y_{ni}\| > \epsilon)\} = P (\|Y_{n1}\| > \epsilon) \leq \frac{E \|Y_{n1}\|^2}{\epsilon^2} = O(q_n/n).$$

Therefore,

$$\sum_{i=1}^n E [\|Y_{ni}\|^2 1\{\|Y_{ni}\| > \epsilon\}] \leq nO(q_n/n)O(\sqrt{q_n/n}) = o(1),$$

and part (ii) of Theorem 2 follows.
